# Supplementary material for: Hepatitis B Virus Genotype Influence on Virological and Enzymatic Measures over Time—A Retrospective Longitudinal Cohort Study
Source: MDPI journal article supplement (doi:10.3390/jcm12216807), 2023-10-27
Supplement: s1 [file s1]

**Table S1.** HBV infection characteristics at baseline and at the time of HCC diagnosis for patients who were diagnosed with hepatocellular cancer (HCC) during follow-up <sup>1</sup>.

| Variable                  | Patient                                                                              |                                                                                      |                                                                                      |                                                                                      |
|---------------------------|--------------------------------------------------------------------------------------|--------------------------------------------------------------------------------------|--------------------------------------------------------------------------------------|--------------------------------------------------------------------------------------|
|                           | 1                                                                                    | 2                                                                                    | 3                                                                                    | 4                                                                                    |
| HBV Genotype              | B                                                                                    | D                                                                                    | B                                                                                    | E                                                                                    |
| Antiviral therapy         | Tenofovir Disoproxil Fumarate                                                        | Tenofovir Disoproxil Fumarate                                                        | Tenofovir Disoproxil Fumarate                                                        | Lamivudine                                                                           |
| Antiviral therapy outcome | HBV DNA below limit of detection following treatment initiation. Remains on therapy. | HBV DNA below limit of detection following treatment initiation. Remains on therapy. | HBV DNA below limit of detection following treatment initiation. Remains on therapy. | HBV DNA below limit of detection following treatment initiation. Remains on therapy. |
| At Baseline:              |                                                                                      |                                                                                      |                                                                                      |                                                                                      |
| Age                       | 57                                                                                   | 68                                                                                   | 62                                                                                   | 31                                                                                   |
| HBV DNA (IU/mL)           | $1.29 \times 10^6$                                                                   | $1.12 \times 10^4$                                                                   | $8.44 \times 10^3$                                                                   | $1.25 \times 10^5$                                                                   |
| ALT (U/L)                 | 44                                                                                   | 41                                                                                   | 50                                                                                   | 25                                                                                   |
| AST (U/L)                 | 31                                                                                   | 28                                                                                   | 48                                                                                   | 22                                                                                   |
| Fibrosis (kPa)            | 17.3                                                                                 | 10.5                                                                                 | 4.3                                                                                  | 15.4                                                                                 |
| CAP Score (dB/m)          | 302                                                                                  | 288                                                                                  | 192                                                                                  | 249                                                                                  |
| At HCC Diagnosis:         |                                                                                      |                                                                                      |                                                                                      |                                                                                      |
| Age                       | 60                                                                                   | 70                                                                                   | 62                                                                                   | 34                                                                                   |
| HBV DNA (IU/mL)           | <20                                                                                  | $4.76 \times 10^1$                                                                   | $9.89 \times 10^2$                                                                   | <20                                                                                  |
| ALT (U/L)                 | 62                                                                                   | 151                                                                                  | 207                                                                                  | 25                                                                                   |
| AST (U/L)                 | 76                                                                                   | 153                                                                                  | 231                                                                                  | 17                                                                                   |
| Fibrosis (kPa)            | -                                                                                    | 5.9                                                                                  | -                                                                                    | -                                                                                    |
| CAP Score (dB/m)          | -                                                                                    | 291                                                                                  | -                                                                                    | -                                                                                    |

<sup>1</sup> All HBV patients diagnosed with HCC were male and had no prior history of antiviral treatment when antiviral treatment was initiated at baseline. All HCC diagnoses were made after antiviral treatment was initiated.
